# Supplementary material
Source: MDPI journal article supplement (https://www.mdpi.com/2073-4352/6/8/99)
Supplement: s1 [file s1]

Supporting Information Supplementary Materials: Photonic Crystals with an Eye Pattern Similar to Peacock Tail Feathers

Minghui Wang, Fanshu Meng, Hua Wu and Jingxia Wang


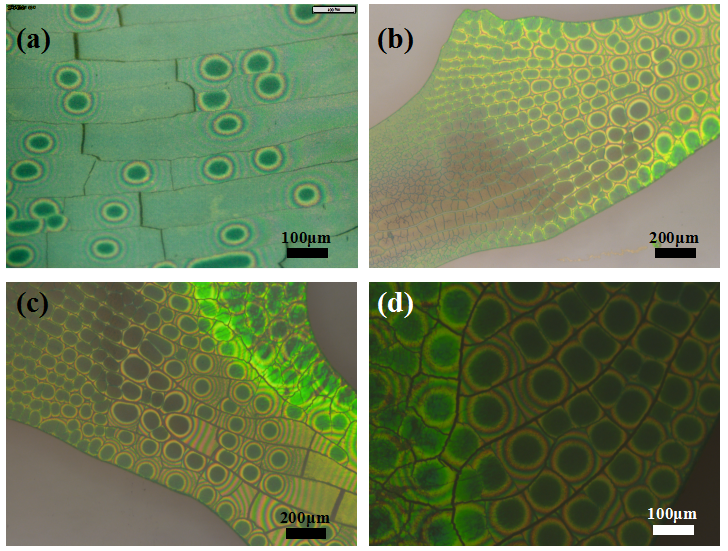


**Figure S1.** Optical microscope images of as-prepared sample. **(a–d)** Different samples of eyes pattern similar to peacock tail feathers in experiments.


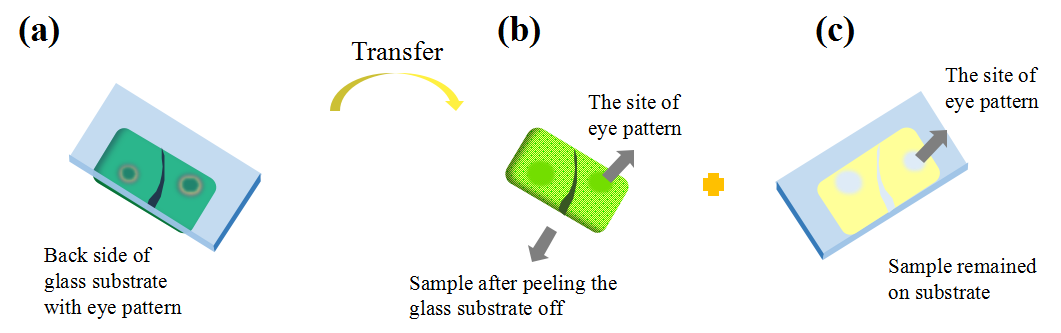


**Figure S2.** Scheme for the further investigation of the eye pattern PC. **(a)** Eye pattern sample observed from the back side of superhydrophilic glass substrate; **(b)** Eye pattern sample after being peeled the glass substrate; **(c)** Eye pattern sample remained on the glass substrate.


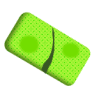

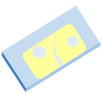

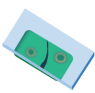

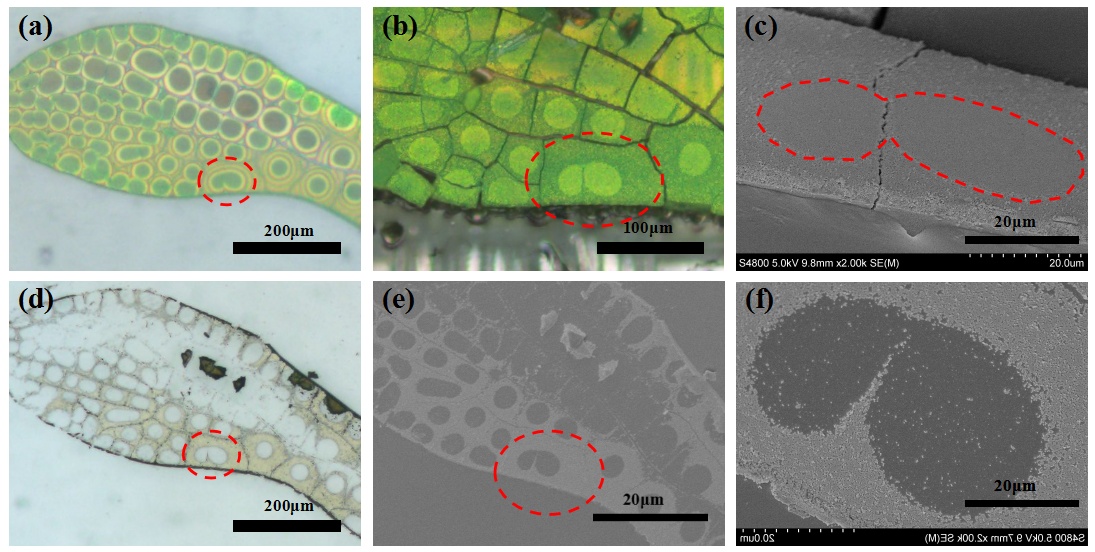


**Figure S3.** Optical microscope images **(a,b,d)** and SEM images **(c,e,f)** of as-prepared eye pattern samples. **(a)** Back side of the sample with eye-pattern; **(b)** Eye pattern sample after being peeled off the substrate; **(c)** SEM image sof red circle part in **(b)**; **(d)** sample remained on the glass substrate; **(e)** SEM image of red circle part in **(d)**; **(f)** SEMimage of amplified part of red circle in **(e)**.

Distinct adhesion force is found for the different region of eye-pattern PCs toward the glass substrate. A lower adhesion force is observed for the core-region of eye-pattern, leaving less particles on the glass substrate after being peeled off, as shown in Figure S3d–f. In contrast, a reinforced adhesion force is observed for the periphery region of eye-pattern, plenty of particles is maintained at the substrate even if being peeled. As shown in Figure S3d–f. Aforementioned results indicates the distinct adhesion force between the sample and substrate may produce some influence on the distinct spectra signal.

**
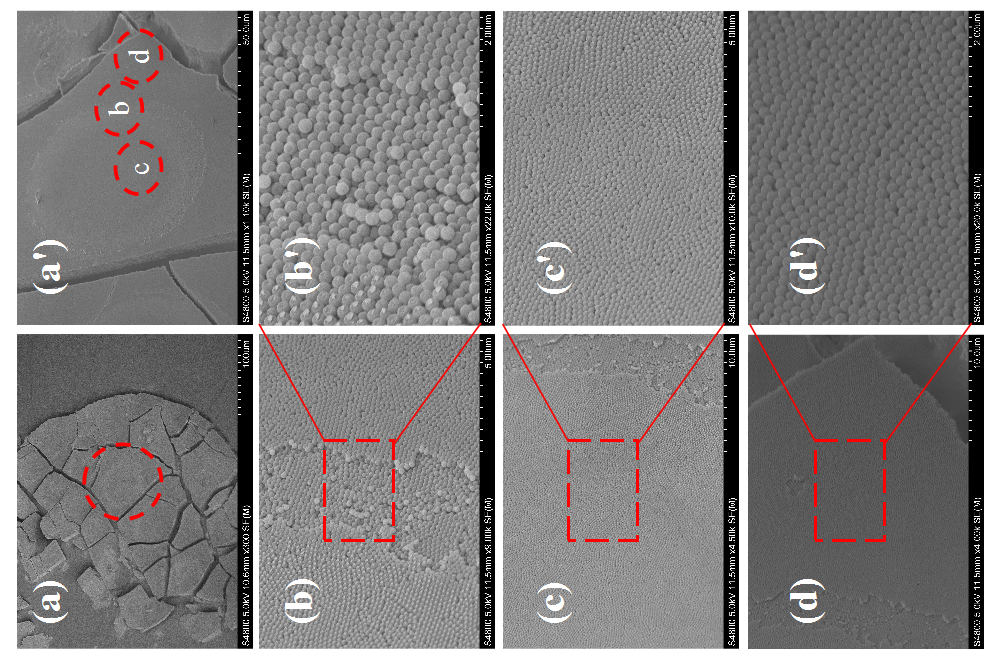
Figure S4.** SEM images of as-prepared eye-pattern sample after being peeling off the substrate. **(a,a’)** The whole picture for the sample with eye-pattern (is circled). A clear circular trace can be observed after being peeling off the substrate. **(****b,c,d, b’,c’,d’)** Amplified part of the sample in (a), indicated the brim region, the core part and the bulk region of the eye-pattern PC. (**b,b’**) brim region of eye pattern, some destroy is observed owing to being peeled from the substrate. (**c,c’**) Center of the eye pattern; (**d**,**d’**) bulk region of the sample.

Figure S4 presents the SEM images of the eye-pattern sample after being peeled from the glass substrate. It was found that there is a clear circular (as shown in Figure S4a,b) formed resulted from the peeling produce owing to the strong adhesion force between the brim sample and the substrate. In contrast, a slight deformed particles is observed for the sample at the core part of eye pattern (Figure S4c,c’), indicating the less adhesion force in this region.


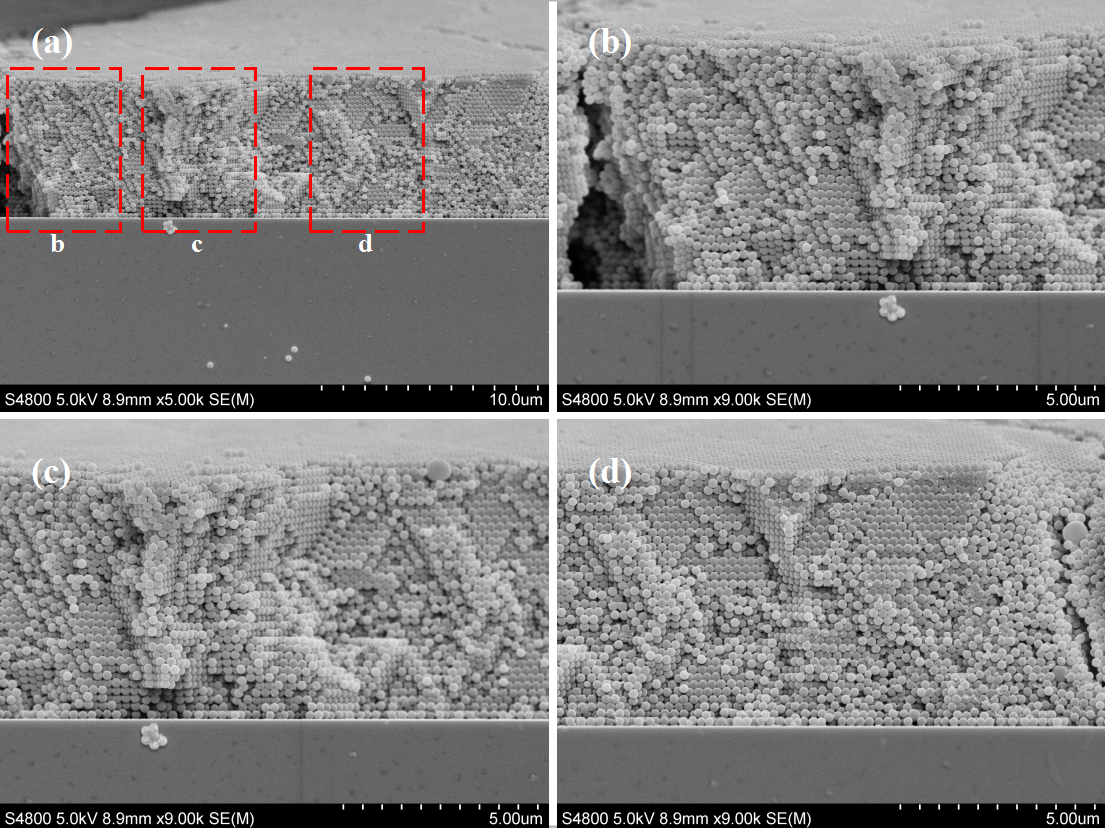


**Figure S5.** SEM images of cross-section of as-prepared sample.**(a)** Cross-section of a pattern in
as-prepared sample; **(b,c,d)** Amplification of rectangle section in **(a)**. Structure near break showed a loose arrangement like in **(b)** and a close package in **(d)**.


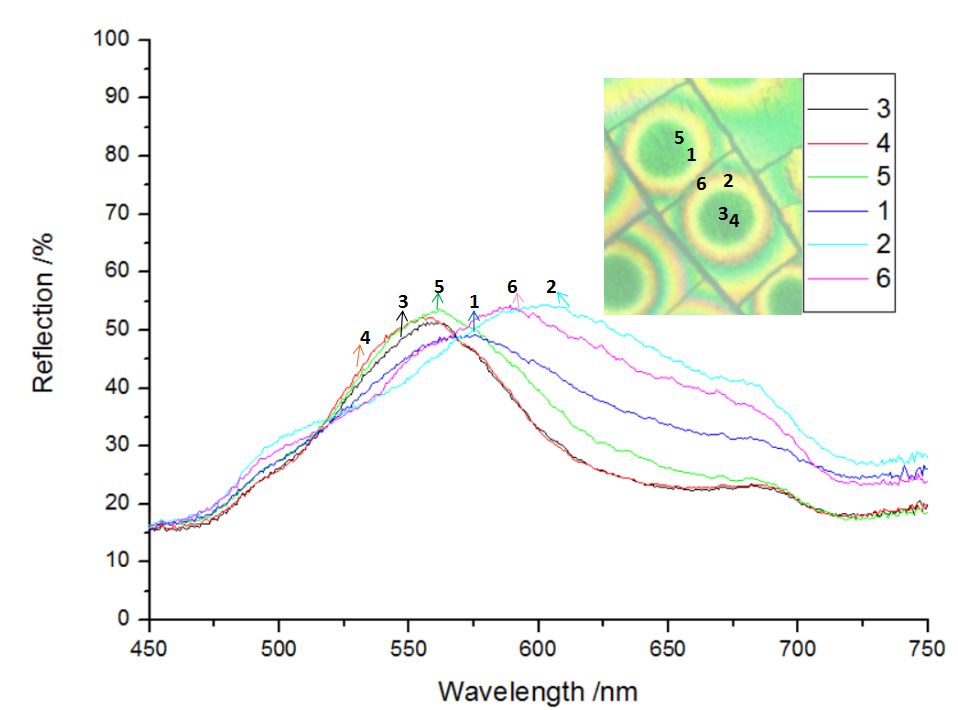


**Figure S6.** Reflection UV-vis spectra ofdifferent part of the peacock eye pattern structure. This spectra focus on different region of the pattern and got the spectra from **spectra** **4** (554 nm) to **spectra** **2** (603.2 nm).

© 2016 by the authors. Submitted for possible open access publication under the
terms and conditions of the Creative Commons Attribution (CC-BY) license (http://creativecommons.org/licenses/by/4.0/).
